# Supplementary material
Source: PubMed Central journal article supplement (PMC2835326)
Supplement: supp_137.7.1107_DEV046045TableS1.pdf [file supp_137.7.1107_DEV046045TableS1.pdf]

**Table S1. Distribution of the genotypes from *Bicc1*<sup>+/-</sup> × *Bicc1*<sup>+/-</sup> crosses**

| <i>Bicc1</i> genotype | E12.5 and earlier (%) | E14.5 (%) | E15.5 (%) | E16.5 (%) | E18.5 (%) | P0/P1 (%) | P2 and older (%) |
|-----------------------|-----------------------|-----------|-----------|-----------|-----------|-----------|------------------|
| +/+                   | 23                    | 35        | 33        | 23        | 28        | 34        | 32               |
| +/-                   | 55                    | 40        | 48        | 57        | 57        | 56        | 60               |
| -/-                   | 23                    | 25        | 19        | 20        | 15        | 10        | 8                |
| <i>n</i>              | 22                    | 20        | 217       | 70        | 146       | 105       | 191              |
